# Supplementary material for: Prognostic factors and prediction models for hospitalisation and all-cause mortality in adults presenting to primary care with a lower respiratory tract infection: a systematic review
Source: HighWire-hosted journal article supplement (doi:10.1136/bmjopen-2023-075475), 2024-03-01
Supplement: bmjopen-2023-075475supp001_data_supplement.pdf [file bmjopen-2023-075475supp001_data_supplement.pdf]

Supplementary data

Table S1: search strategy

| Search date: 27 June 2022                                                                                                                                                                                                                                                                                                                                                                                                                                                                                                                                                                                                                                                                                                                                                                                                                                                                                                                                                                                                                                                                                                            |                                                                                                                                                                                                                                                                                                                                                                                                                                                                                                                                                                                                                                                                                                                                                                                                                                                                                                                                                                                                                                                                                                                                                                                     |                                                                                                                                                                                                                                                                                                                                                                                               |
|--------------------------------------------------------------------------------------------------------------------------------------------------------------------------------------------------------------------------------------------------------------------------------------------------------------------------------------------------------------------------------------------------------------------------------------------------------------------------------------------------------------------------------------------------------------------------------------------------------------------------------------------------------------------------------------------------------------------------------------------------------------------------------------------------------------------------------------------------------------------------------------------------------------------------------------------------------------------------------------------------------------------------------------------------------------------------------------------------------------------------------------|-------------------------------------------------------------------------------------------------------------------------------------------------------------------------------------------------------------------------------------------------------------------------------------------------------------------------------------------------------------------------------------------------------------------------------------------------------------------------------------------------------------------------------------------------------------------------------------------------------------------------------------------------------------------------------------------------------------------------------------------------------------------------------------------------------------------------------------------------------------------------------------------------------------------------------------------------------------------------------------------------------------------------------------------------------------------------------------------------------------------------------------------------------------------------------------|-----------------------------------------------------------------------------------------------------------------------------------------------------------------------------------------------------------------------------------------------------------------------------------------------------------------------------------------------------------------------------------------------|
| Pubmed                                                                                                                                                                                                                                                                                                                                                                                                                                                                                                                                                                                                                                                                                                                                                                                                                                                                                                                                                                                                                                                                                                                               | Embase                                                                                                                                                                                                                                                                                                                                                                                                                                                                                                                                                                                                                                                                                                                                                                                                                                                                                                                                                                                                                                                                                                                                                                              | The Cochrane Library                                                                                                                                                                                                                                                                                                                                                                          |
| (((("RTI"[Title/Abstract] OR "respiratory tract infection"[Title/Abstract] OR "respiratory infection"[Title/Abstract] OR "pneumonia"[Title/Abstract] OR "bronchitis"[Title/Abstract] OR "lung infection"[Title/Abstract] OR "chest infection"[Title/Abstract]) OR ("Respiratory Tract Infections"[Mesh])) AND (((Validat* OR Predict*[Title OR Rule*] OR (Predict* AND (Outcome* OR Risk* OR Model*)) OR ((History OR Variable* OR Criteria OR Scor* OR Characteristic* OR Finding* OR Factor*) AND (Predict* OR Model* OR Decision* OR Identif* OR Prognos*)) OR (Decision* AND (Model* OR Clinical* OR Logistic Models)) OR (Prognostic AND (History OR Variable* OR Criteria OR Scor* OR Characteristic* OR Finding* OR Factor* OR Model*))) OR ("Stratification" OR "ROC Curve"[Mesh] OR "Discrimination" OR "Discriminate" OR "c-statistic" OR "c statistic" OR "Area under the curve" OR "AUC" OR "Calibration" OR "Indices" OR "Algorithm" OR "Multivariable")))) AND (("hospital"[Title/Abstract] OR "complicat"[Title/Abstract] OR "morbidity"[Title/Abstract] OR "death"[Title/Abstract] OR "mortality"[Title/Abstract] OR | ((('rti':ti,ab,kw OR 'respiratory tract infection':ti,ab,kw OR 'respiratory infection':ti,ab,kw OR 'pneumonia':ti,ab,kw OR 'bronchitis':ti,ab,kw OR 'lung infection':ti,ab,kw OR 'chest infection':ti,ab,kw) OR ('respiratory tract infection'/exp OR 'respiratory tract inflammation'/exp)) AND ((validat* OR predict*:ti OR rule* OR (predict* AND (outcome* OR risk* OR model*)) OR ((history OR variable* OR criteria OR scor* OR characteristic* OR finding* OR factor*) AND (predict* OR model* OR decision* OR identif* OR prognos*)) OR (decision* AND (model* OR clinical* OR logistic) AND models) OR (prognostic AND (history OR variable* OR criteria OR scor* OR characteristic* OR finding* OR factor* OR model*))) OR ('stratification' OR 'receiver operating characteristic'/exp OR 'discrimination' OR 'discriminate' OR 'c-statistic' OR 'c statistic' OR 'area under the curve' OR 'auc' OR 'calibration' OR 'indices' OR 'algorithm' OR 'multivariable')) AND (('hospital':ti,ab,kw OR 'complicat':ti,ab,kw OR 'morbidity':ti,ab,kw OR 'death':ti,ab,kw OR 'mortality':ti,ab,kw OR 'surviv':ti,ab,kw) OR ('hospitalization'/exp OR 'hospital admission'/exp OR | (RTI OR respiratory tract infection OR respiratory infection OR pneumonia OR bronchitis OR lung infection OR chest infection) AND (hospitalisation OR hospitalization OR hospital OR complication OR complicated OR morbidity OR death OR mortality OR survival OR survive) AND (Primary care OR general practice OR general practitioner OR family practice OR GP) in Title Abstract Keyword |

|                                                                                                                                                                                                                                                                                                                                                                                                                                                                                                                                                                                                                                                                                       |                                                                                                                                                                                                                                                                                                                                                                                                                                                                      |                                                                                     |
|---------------------------------------------------------------------------------------------------------------------------------------------------------------------------------------------------------------------------------------------------------------------------------------------------------------------------------------------------------------------------------------------------------------------------------------------------------------------------------------------------------------------------------------------------------------------------------------------------------------------------------------------------------------------------------------|----------------------------------------------------------------------------------------------------------------------------------------------------------------------------------------------------------------------------------------------------------------------------------------------------------------------------------------------------------------------------------------------------------------------------------------------------------------------|-------------------------------------------------------------------------------------|
| "surviv*" [Title/Abstract] OR ("Mortality" [Mesh] OR "Hospitalization" [Mesh] OR "Death" [Mesh])) AND (("Primary care" [Title/Abstract] OR "general practi*" [Title/Abstract] OR "family practice" [Title/Abstract] OR "GP" [Title/Abstract]) OR ("Primary Health Care" [Mesh] OR "Family Practice" [Mesh] OR "General Practice" [Mesh])) NOT (("child*" [Title/Abstract] OR "pediatric*" [Title/Abstract] OR "paediatric*" [Title/Abstract] OR "infan*" [Title/Abstract] OR "adolescen*" [Title/Abstract] OR "young*" [Title/Abstract] OR "newborn*" [Title/Abstract]) OR ("Infant" [Mesh] OR "Child" [Mesh] OR "Adolescent" [Mesh] OR "Pediatrics" [Mesh] OR "Young Adult" [Mesh])) | 'death'/exp OR 'mortality'/exp)) AND (('primary care':ti,ab,kw OR 'general practi*':ti,ab,kw OR 'family practice':ti,ab,kw OR 'gp':ti,ab,kw) OR ('primary medical care'/exp OR 'primary health care'/exp OR 'general practice'/exp)) NOT (('child*':ti,ab,kw OR 'pediatric*':ti,ab,kw OR 'paediatric*':ti,ab,kw OR 'infan*':ti,ab,kw OR 'adolescen*':ti,ab,kw OR 'young*':ti,ab,kw OR 'newborn*':ti,ab,kw) OR ('child'/exp OR 'adolescent'/exp OR 'pediatrics'/exp)) |                                                                                     |
| Filters: none<br>Language restrictions: none<br>Publication date restrictions: none                                                                                                                                                                                                                                                                                                                                                                                                                                                                                                                                                                                                   | Filters: none<br>Language restrictions: none<br>Publication date restrictions: none                                                                                                                                                                                                                                                                                                                                                                                  | Filters: none<br>Language restrictions: none<br>Publication date restrictions: none |
| Records identified: 1592                                                                                                                                                                                                                                                                                                                                                                                                                                                                                                                                                                                                                                                              | Records identified: 1392                                                                                                                                                                                                                                                                                                                                                                                                                                             | Records identified: 207                                                             |

**Figure S2:** Overall assessment of risk of bias and applicability of included studies

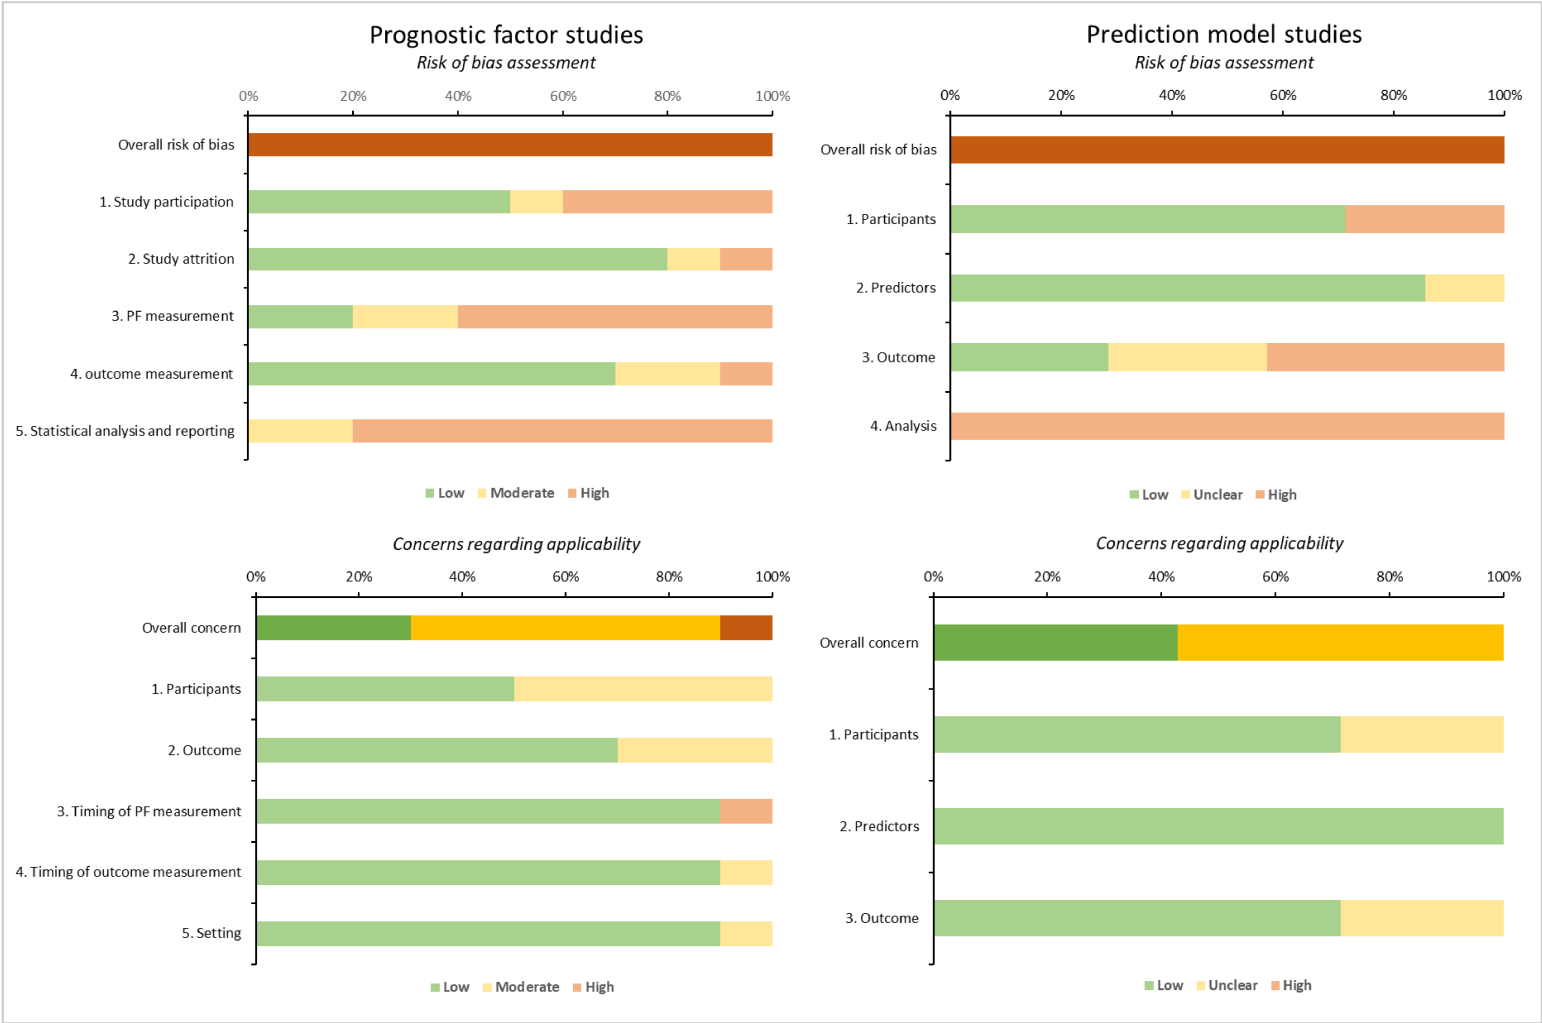

Figure S3: Risk of bias assessment and applicability per individual included study

| QUIPS assessment of prognostic factor studies |                     |                 |                |                     |                                    |               |         |                          |                               |         |         |               |
|-----------------------------------------------|---------------------|-----------------|----------------|---------------------|------------------------------------|---------------|---------|--------------------------|-------------------------------|---------|---------|---------------|
| Study                                         | RoB                 |                 |                |                     |                                    | Applicability |         |                          |                               |         | Overall |               |
|                                               | Study participation | Study attrition | PF measurement | Outcome measurement | Statistical analysis and reporting | Participants  | Outcome | Timing of PF measurement | Timing of outcome measurement | Setting | RoB     | Applicability |
| Houston, 1997                                 | ⊕                   | +               | -              | +                   | -                                  | +             | +       | +                        | +                             | ⊕       | -       | ⊕             |
| Seppä, 2001                                   | -                   | ⊕               | -              | +                   | -                                  | +             | +       | +                        | +                             | +       | -       | +             |
| Hak, 2005                                     | +                   | +               | ⊕              | +                   | -                                  | +             | ⊕       | +                        | +                             | +       | -       | ⊕             |
| Myles, 2009                                   | -                   | +               | +              | ⊕                   | -                                  | +             | +       | +                        | +                             | +       | -       | +             |
| van de Nadort, 2009                           | +                   | +               | +              | ⊕                   | -                                  | ⊕             | +       | +                        | +                             | +       | -       | ⊕             |
| Winchester, 2009                              | +                   | +               | -              | +                   | -                                  | ⊕             | ⊕       | +                        | +                             | +       | -       | ⊕             |
| Millett, 2015                                 | +                   | +               | ⊕              | +                   | -                                  | +             | +       | +                        | +                             | +       | -       | +             |
| Moore, 2019                                   | -                   | +               | -              | +                   | ⊕                                  | ⊕             | ⊕       | +                        | +                             | +       | -       | ⊕             |
| Hamilton, 2021                                | +                   | -               | -              | +                   | ⊕                                  | ⊕             | +       | +                        | +                             | +       | -       | ⊕             |
| Martínez-Redondo, 2021                        | -                   | +               | -              | -                   | -                                  | ⊕             | +       | -                        | ⊕                             | +       | -       | -             |

| PROBAST assessment of prediction model studies |              |            |         |          |               |            |         |         |               |
|------------------------------------------------|--------------|------------|---------|----------|---------------|------------|---------|---------|---------------|
| Study                                          | RoB          |            |         |          | Applicability |            |         | Overall |               |
|                                                | Participants | Predictors | Outcome | Analysis | Participants  | Predictors | Outcome | RoB     | Applicability |
| Bont, 2007                                     | +            | +          | -       | -        | +             | +          | +       | -       | +             |
| Bont, 2008                                     | -            | +          | ?       | -        | +             | +          | +       | -       | +             |
| Ochoa-Gondar, 2011                             | +            | ?          | ?       | -        | ?             | +          | +       | -       | ?             |
| Francis, 2012                                  | -            | +          | -       | -        | +             | +          | +       | -       | +             |
| Ochoa-Gondar, 2013                             | +            | +          | +       | -        | ?             | +          | +       | -       | ?             |
| Bruyndonckx, 2018                              | +            | +          | +       | -        | +             | +          | ?       | -       | ?             |
| Moore, 2019                                    | +            | +          | +       | -        | +             | +          | ?       | -       | ?             |

Figure S4: figure of all PF effect estimates based on univariable analysis

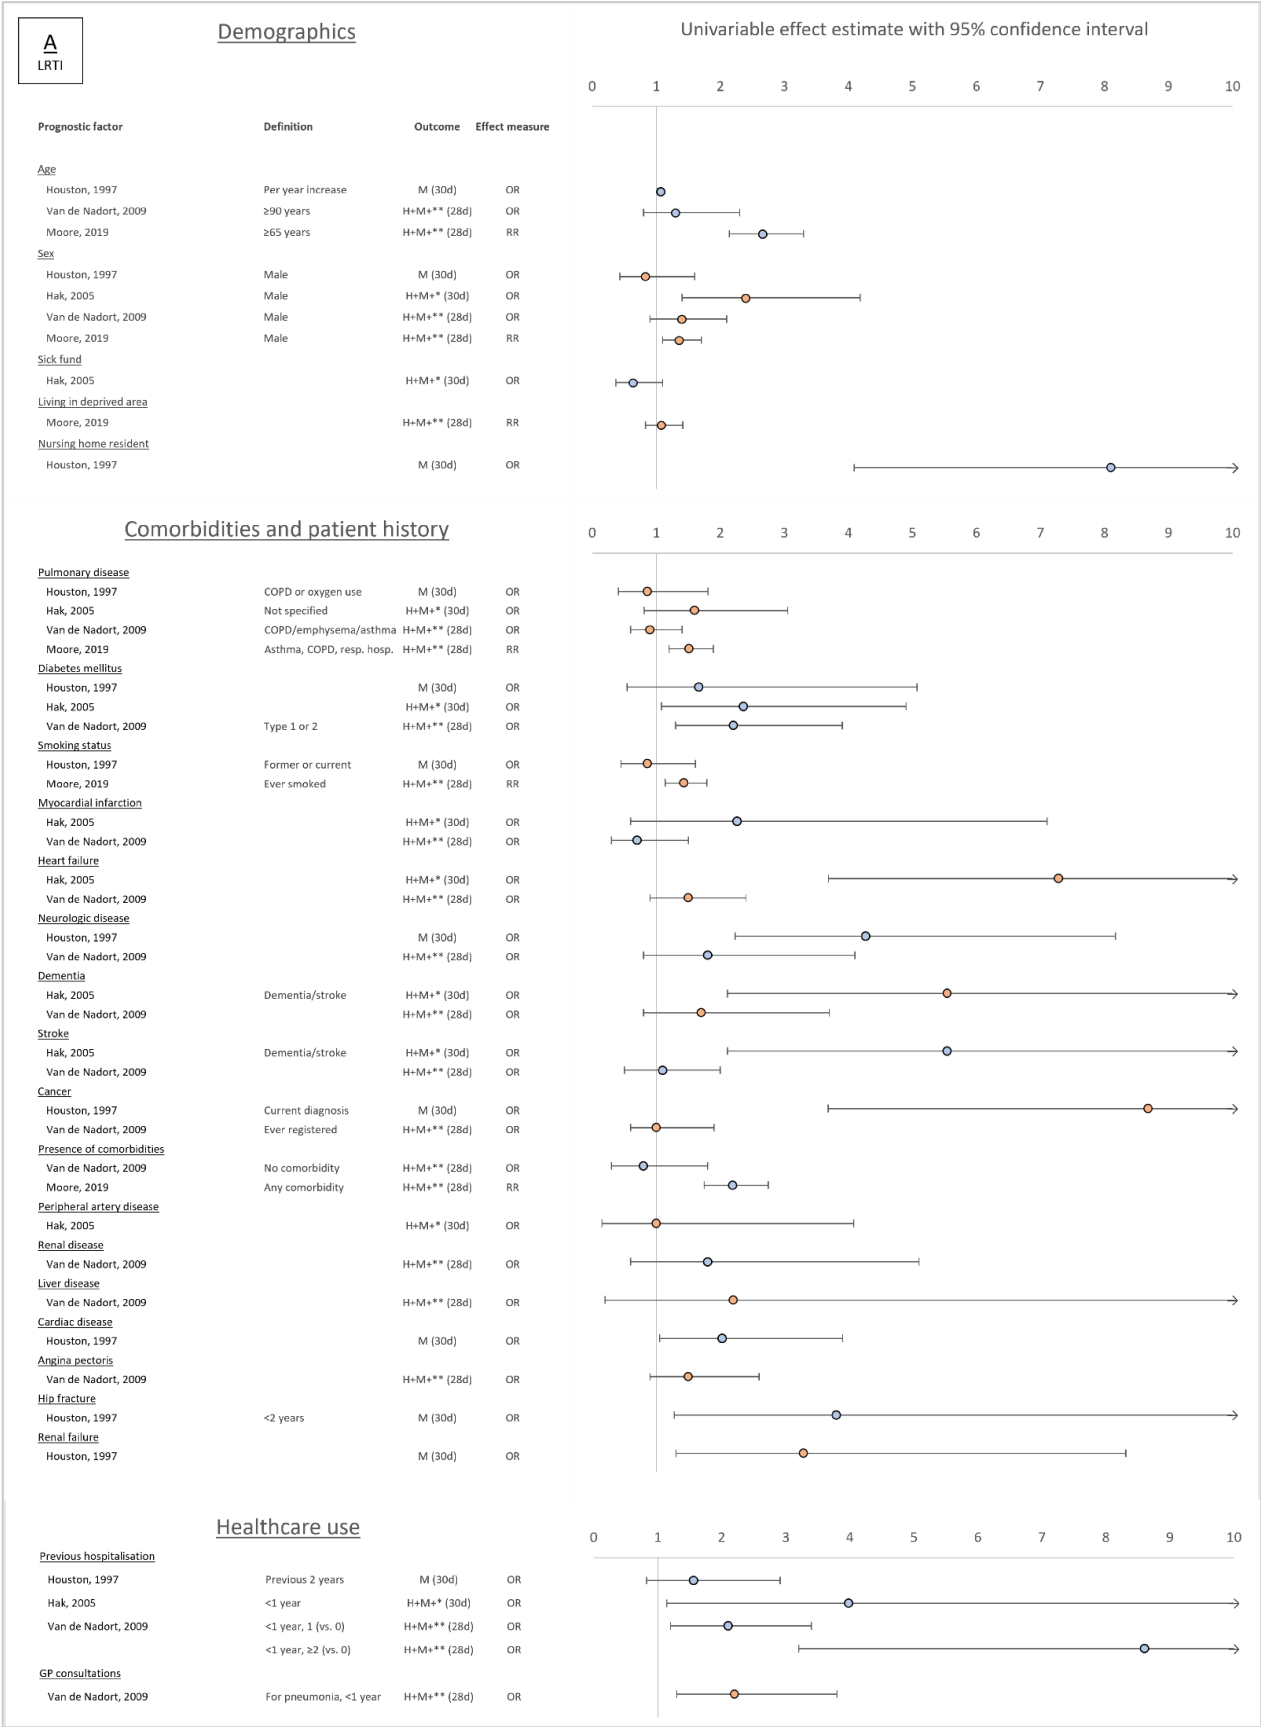

S4, continued

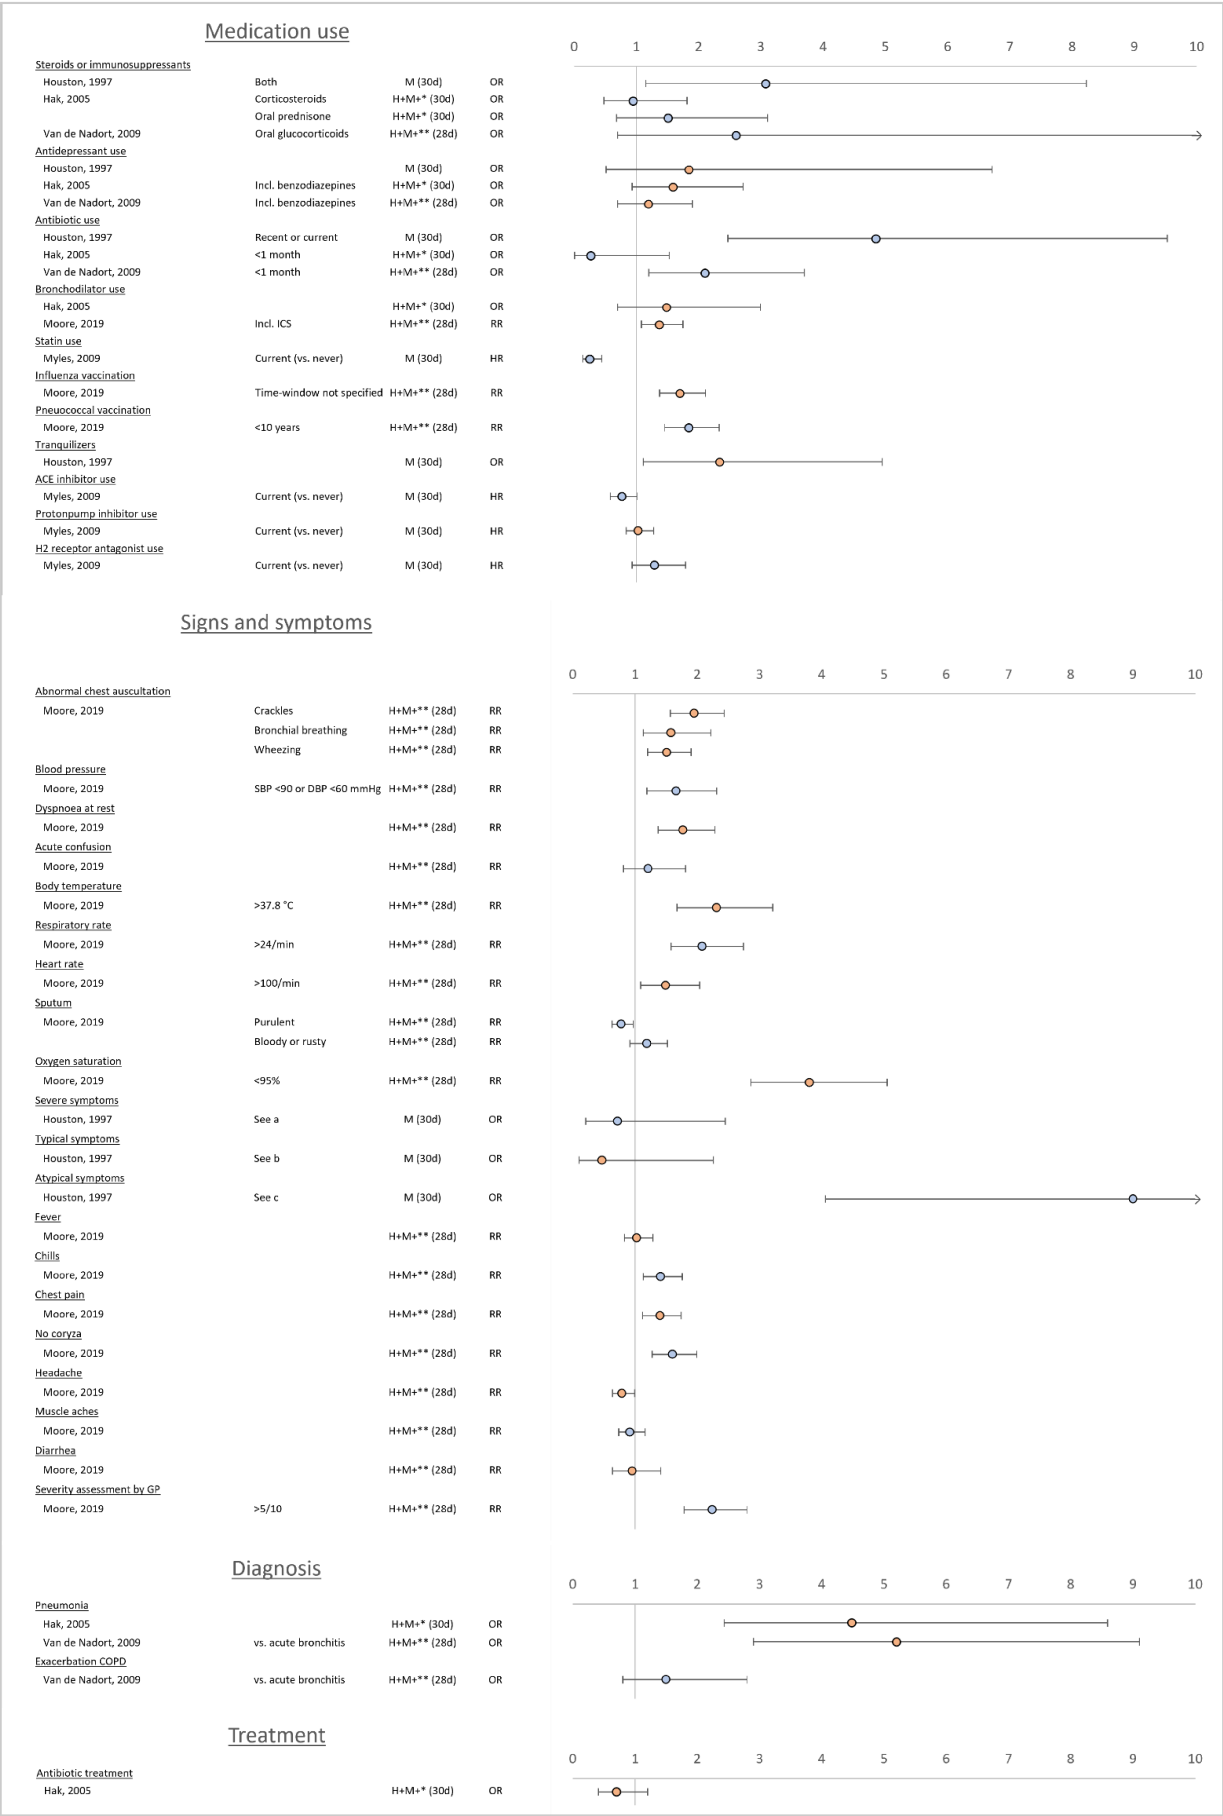

S4, continued

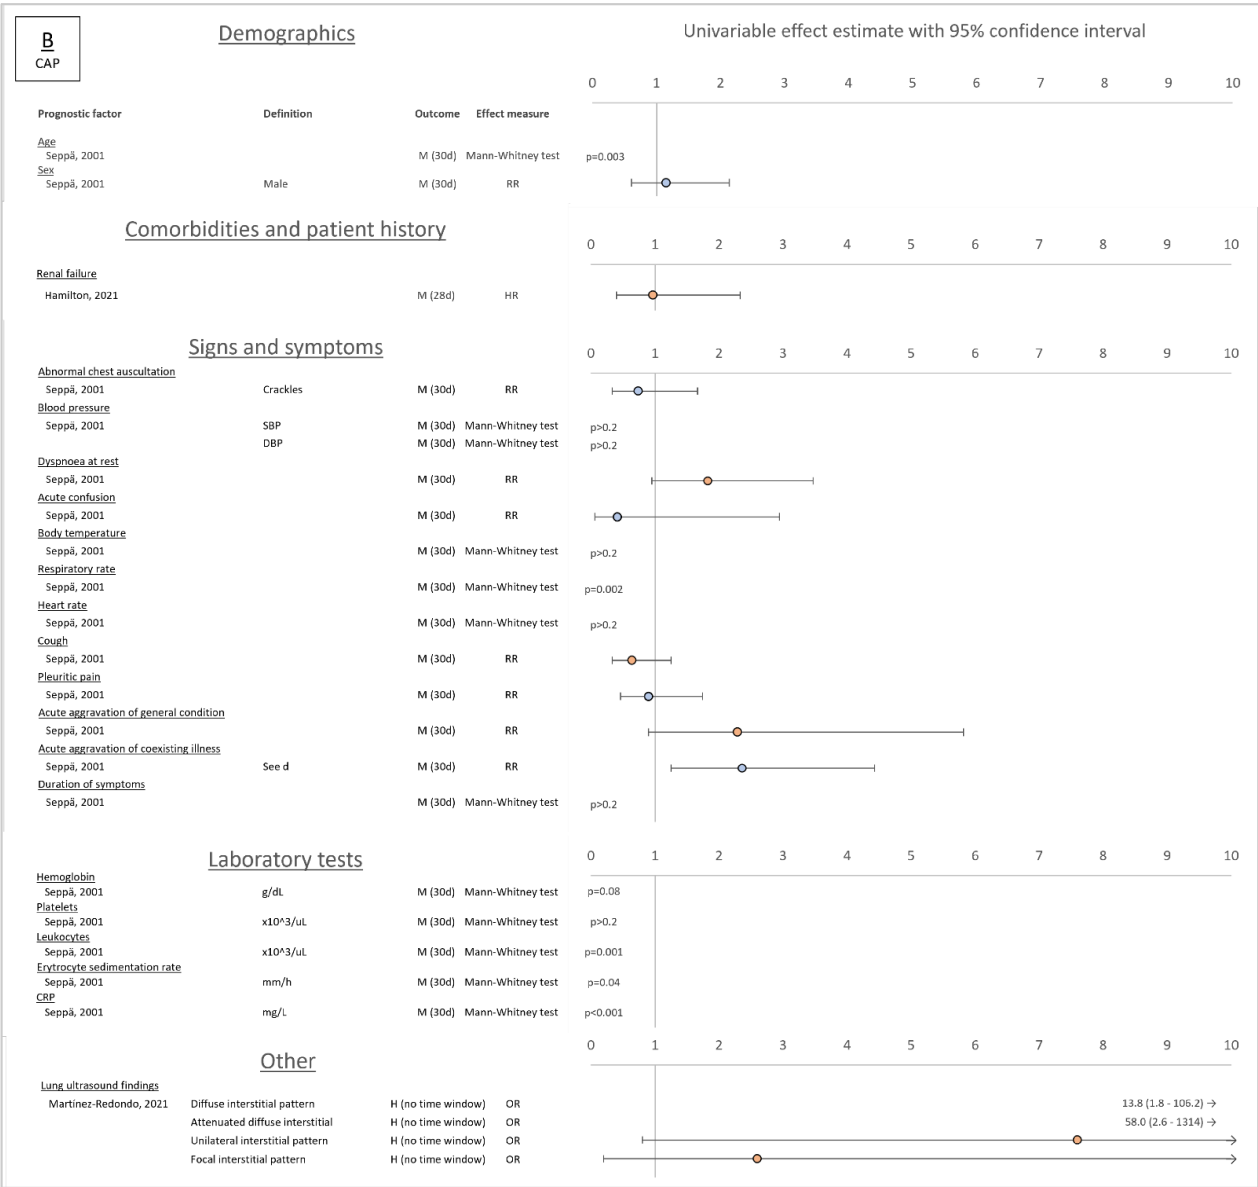

A. Univariable analyses of prognostic factors from studies on LRTI patients. B. Univariable analysis of prognostic factors from studies on pneumonia patients.

\* Composite outcome also includes dysregulation of diabetes, stroke, heart failure, MI.

\*\* Composite outcome also includes late onset pneumonia.

a: rigor, hemoptysis, pleuritic pain.

b: chills, cough, congestion, fever, dyspnea, sputum production.

c: poor eating, confusion, lethargy.

d: impairment of glucose balance in diabetic patients, deterioration of congestive heart failure.

Abbreviations: LRTI, lower respiratory tract infection; H, hospitalisation; M, mortality; OR, odds ratio; RR, risk ratio; HR, hazard ratio; COPD, chronic obstructive pulmonary disease; GP, general practitioner; ICS, inhalation corticosteroids; ACE, angiotensin converting enzyme; SBP, systolic blood pressure; DBP, diastolic blood pressure; min, minute; g, gram; dL, deciliter; uL, microliter; mm, millimeter; h, hour; L, liter.

**Table S5.** Absolute risks according to absence and presence of individual (categorical) prognostic factors

| Study                                  | Houston, 1997      | Seppä, 2001        | Hak, 2005                              | Winchester, 2009                                              |                     | Van de Nadort, 2009         | Myles, 2009        | Millett, 2015  | Moore, 2019                                     | Hamilton, 2021     | Martínez-Redondo, 2021 |
|----------------------------------------|--------------------|--------------------|----------------------------------------|---------------------------------------------------------------|---------------------|-----------------------------|--------------------|----------------|-------------------------------------------------|--------------------|------------------------|
| Absolute risks provided or calculable? | No                 | Yes                | Yes                                    | Yes                                                           |                     | Yes                         | Yes                | Yes            | Yes                                             | No                 | Yes                    |
| Outcome definition                     | Mortality <30 days | Mortality <30 days | Composite including mortality <30 days | Hosp. <3 months                                               | Mortality <3 months | Hosp. or mortality <30 days | Mortality <30 days | Hosp. <28 days | Composite including hosp. or mortality <30 days | Mortality <28 days | Hosp.                  |
| Baseline risk of outcome               | 10.7 %             | 4.0 %              | 14.3%                                  | 0.8 %                                                         | 1.4 %               | 12.7 %                      | 24.6 %             | 76.5 %         | 1.1 %                                           | 8.9 %              | 23.0 %                 |
| Prognostic factor                      |                    |                    |                                        | Absolute risk according to prognostic factor (present/absent) |                     |                             |                    |                |                                                 |                    |                        |
| <i>Demographics</i>                    |                    |                    |                                        |                                                               |                     |                             |                    |                |                                                 |                    |                        |
| Male sex                               |                    | 4.3/3.7 %          | 20.2/9.5 %                             | 0.8/0.7 %                                                     | 1.5/1.3 %           | 14.2/11.8 %                 |                    | 79.5/73.8 %    | 1.3/0.9 %                                       |                    |                        |
| Sick fund                              |                    |                    | 12.3/18.1 %                            |                                                               |                     |                             |                    |                |                                                 |                    |                        |
| Living in deprived area                |                    |                    |                                        |                                                               |                     |                             |                    |                | 1.2/1.1 %                                       |                    |                        |
| <i>Medical history</i>                 |                    |                    |                                        |                                                               |                     |                             |                    |                |                                                 |                    |                        |
| Heart failure                          |                    |                    | 46.7/10.7 %                            |                                                               |                     | 16.4/10.8 %                 |                    | 79.6/75.5 %    |                                                 |                    |                        |
| Dementia/ stroke                       |                    |                    | 45.0/12.9 %                            |                                                               |                     | 17.0/12.4 %                 |                    | 66.8/78.2 %    |                                                 |                    |                        |
|                                        |                    |                    |                                        |                                                               |                     | 12.0/12.8 %                 |                    |                |                                                 |                    |                        |
| Myocardial infarct.                    |                    |                    | 26.7/13.9 %                            |                                                               |                     | 11.5/12.8 %                 |                    | 83.2/75.4 %    |                                                 |                    |                        |
| Periph. arterial dis.                  |                    |                    | 14.3/14.3 %                            |                                                               |                     |                             |                    | 82.7/75.5 %    |                                                 |                    |                        |
| Diabetes mellitus                      |                    |                    | 26.2/13.1 %                            |                                                               |                     | 23.1/10.8 %                 |                    | 82.6/75.2 %    |                                                 |                    |                        |
| Prior hospitalisation                  |                    |                    | 38.5/13.6 %                            |                                                               |                     | 36.0/10.1 %                 |                    |                |                                                 |                    |                        |
| Smoking                                |                    |                    |                                        | 0.6/0.8 %                                                     | 0.9/1.7 %           |                             |                    |                | 13.1/0.9 %                                      |                    |                        |
| Alcohol                                |                    |                    |                                        | 0.7/0.8 %                                                     | 1.1/2.3 %           |                             |                    |                |                                                 |                    |                        |
| Asthma/COPD                            |                    |                    | 19.7/13.3 %                            | 0.8/0.8 %                                                     | 0.7/1.5 %           | 12.3/12.9 %                 |                    | 83.4/71.8 %    | 1.5/1.0 %                                       |                    |                        |
| All. rhinitis                          |                    |                    |                                        | 0.7/0.8 %                                                     | 0.5/1.5 %           |                             |                    |                |                                                 |                    |                        |
| Malignancies                           |                    |                    |                                        |                                                               |                     | 11.9/12.8 %                 |                    | 80.7/75.6 %    |                                                 |                    |                        |
| Angina pectoris                        |                    |                    |                                        |                                                               |                     | 18.2/11.4 %                 |                    | 81.5/75.2 %    |                                                 |                    |                        |
| Neurological dis.                      |                    |                    |                                        |                                                               |                     | 18.0/12.3 %                 |                    | 73.1/76.8 %    |                                                 |                    |                        |
| Renal disease                          |                    |                    |                                        |                                                               |                     | 19.0/12.5 %                 |                    | 88.6/73.8 %    |                                                 |                    |                        |
| Liver disease                          |                    |                    |                                        |                                                               |                     | 25.0/12.6 %                 |                    | 85.5/76.4 %    |                                                 |                    |                        |
| Connective tissue dis.                 |                    |                    |                                        |                                                               |                     |                             |                    | 81.9/75.9 %    |                                                 |                    |                        |

|                                      |             |           |           |             |             |           |
|--------------------------------------|-------------|-----------|-----------|-------------|-------------|-----------|
| Peptic ulcer                         |             |           |           |             | 81.1/76.0 % |           |
| Hemiplegia                           |             |           |           |             | 76.4/76.5 % |           |
| Leukaemia/lymphoma                   |             |           |           |             | 85.0/76.2   |           |
| Cerebrovascular dis.                 |             |           |           |             | 74.5/77.2 % |           |
| Terminal illness                     |             |           |           |             | 67.1/76.9 % |           |
| <hr/>                                |             |           |           |             |             |           |
| <i>Medication use</i>                |             |           |           |             |             |           |
| Antidepressant/<br>benzodiazepines   | 18.1/12.2 % |           |           | 15.4/11.6 % |             |           |
| Corticosteroids                      | 13.8/14.4 % |           |           |             |             |           |
| Oral prednisone                      | 19.2/13.6 % |           |           | 37.5/11.7 % | 83.0/75.4 % |           |
| Immunosuppressants                   |             |           |           |             | 85.3/76.3 % |           |
| ICS                                  |             |           |           |             | 84.7/74.6 % |           |
| Bronchodilator                       | 19.0/13.6 % |           |           |             |             | 1.4/1.0 % |
| Recent antibiotics                   | 4.5/14.8 %  | 2.8/0.7 % | 3.4/1.4 % | 24.2/11.8 % | 74.8/77.2 % |           |
| Vaccination                          |             |           |           |             |             |           |
| Influenza                            |             | 0.9/0.4 % | 2.4/0.8 % |             | 76.2/69.7 % | 1.5/0.9 % |
| Pneumococcal                         |             | 1.0/0.7 % | 2.6/1.1 % |             | 81.3/33.6 % | 1.8/1.0 % |
| Statin use                           |             |           |           |             | 6.8/25.5 %  |           |
| ACEi use                             |             |           |           |             | 18.6/25.1 % |           |
| PPI use                              |             |           |           |             | 26.1/24.4 % |           |
| H2 antagonist                        |             |           |           |             | 31.7/24.3 % |           |
| <hr/>                                |             |           |           |             |             |           |
| <i>Presenting signs and symptoms</i> |             |           |           |             |             |           |
| Cough                                | 3.6/5.6 %   |           |           |             |             |           |
| Dyspnoea                             | 5.3/2.9 %   |           |           |             |             | 1.3/0.8 % |
| Pleuritic pain                       | 3.8/4.2 %   |           |           |             |             |           |
| Confusion                            | 1.8/4.4 %   |           |           |             |             | 1.3/1.1 % |
| Aggravation of                       |             |           |           |             |             |           |
| General condition                    | 3.7/4.7 %   |           |           |             |             |           |
| Coexisting illness                   | 7.6/3.2 %   |           |           |             |             |           |
| Abn. auscultation                    | 3.7/5.0%    |           |           |             |             |           |
| Fever                                |             |           |           |             |             | 1.1/1.1 % |
| Chills                               |             |           |           |             |             | 1.4/1.0 % |
| Chest pain                           |             |           |           |             |             | 1.4/1.0 % |
| No coryza                            |             |           |           |             |             | 1.4/0.9 % |
| Muscle aches                         |             |           |           |             |             | 1.1/1.2 % |
| Diarrhoea                            |             |           |           |             |             | 1.1/1.1 % |
| Purulent sputum                      |             |           |           |             |             | 1.0/1.3 % |
| Bloody sputum                        |             |           |           |             |             | 1.6/1.1 % |
| Severity assessment                  |             |           |           |             |             |           |
| >5/10                                |             |           |           |             |             | 1.7/0.7 % |
| Respiratory rate                     |             |           |           |             |             |           |
| >24/min                              |             |           |           |             |             | 2.1/1.0 % |

|                                 |            |            |             |             |
|---------------------------------|------------|------------|-------------|-------------|
| Temperature >37.8               |            |            |             | 2.4/0/1 %   |
| Pulse >100/min                  |            |            |             | 1.6/1.1 %   |
| O <sub>2</sub> saturation <95 % |            |            |             | 3.5/0.9 %   |
| SBP<90 or DBP<60 mmHg           |            |            |             | 1.8/1.1 %   |
| Crackles                        |            |            |             | 15.7/0.8 %  |
| Bronchial breathing             |            |            |             | 1.7/1.1 %   |
| Wheezing                        |            |            |             | 1.5/1.0 %   |
| <hr/>                           |            |            |             |             |
| LRTI diagnosis                  |            |            |             |             |
| Pneumonia                       | 22.6/6.1 % | 27.3/8.0 % |             |             |
| Exacerbation COPD               |            | 9.9/14.5 % |             |             |
| Acute bronchitis                |            | 5.8/16.5 % |             |             |
| <i>Frailty factors</i>          |            |            |             |             |
| Recent carer                    |            |            | 79.6/76.3 % |             |
| Visual impairment               |            |            | 78.8/75.3 % |             |
| Self-care                       |            |            | 79.7/76.4 % |             |
| Anxious/depressed               |            |            | 76.0/76.5 % |             |
| Bedsore/ulcer                   |            |            | 59.7/77.0 % |             |
| Mobility issues                 |            |            | 79.0/76.3 % |             |
| Tired                           |            |            | 74.4/76.6 % |             |
| Low weight/nutrition            |            |            | 75.1/76.7 % |             |
| Incontinence                    |            |            | 71.7/77.0   |             |
| History of falling              |            |            | 76.4/76.5 % |             |
| <hr/>                           |            |            |             |             |
| <i>Lung ultrasound</i>          |            |            |             |             |
| Abnormal                        |            |            |             | 28.2/3.33 % |

Abbreviations: NR, not reported; COPD, chronic obstructive pulmonary disease; ICS, inhaled corticosteroids; ACEi, angiotensin converting enzyme inhibitor; PPI, protonpump inhibitor; H2, histamine-2; SBP, systolic blood pressure; DBP, diastolic blood pressure; LRTI, lower respiratory tract infection.

Figure S6: figure of all PF effect estimates based on multivariable effect estimates

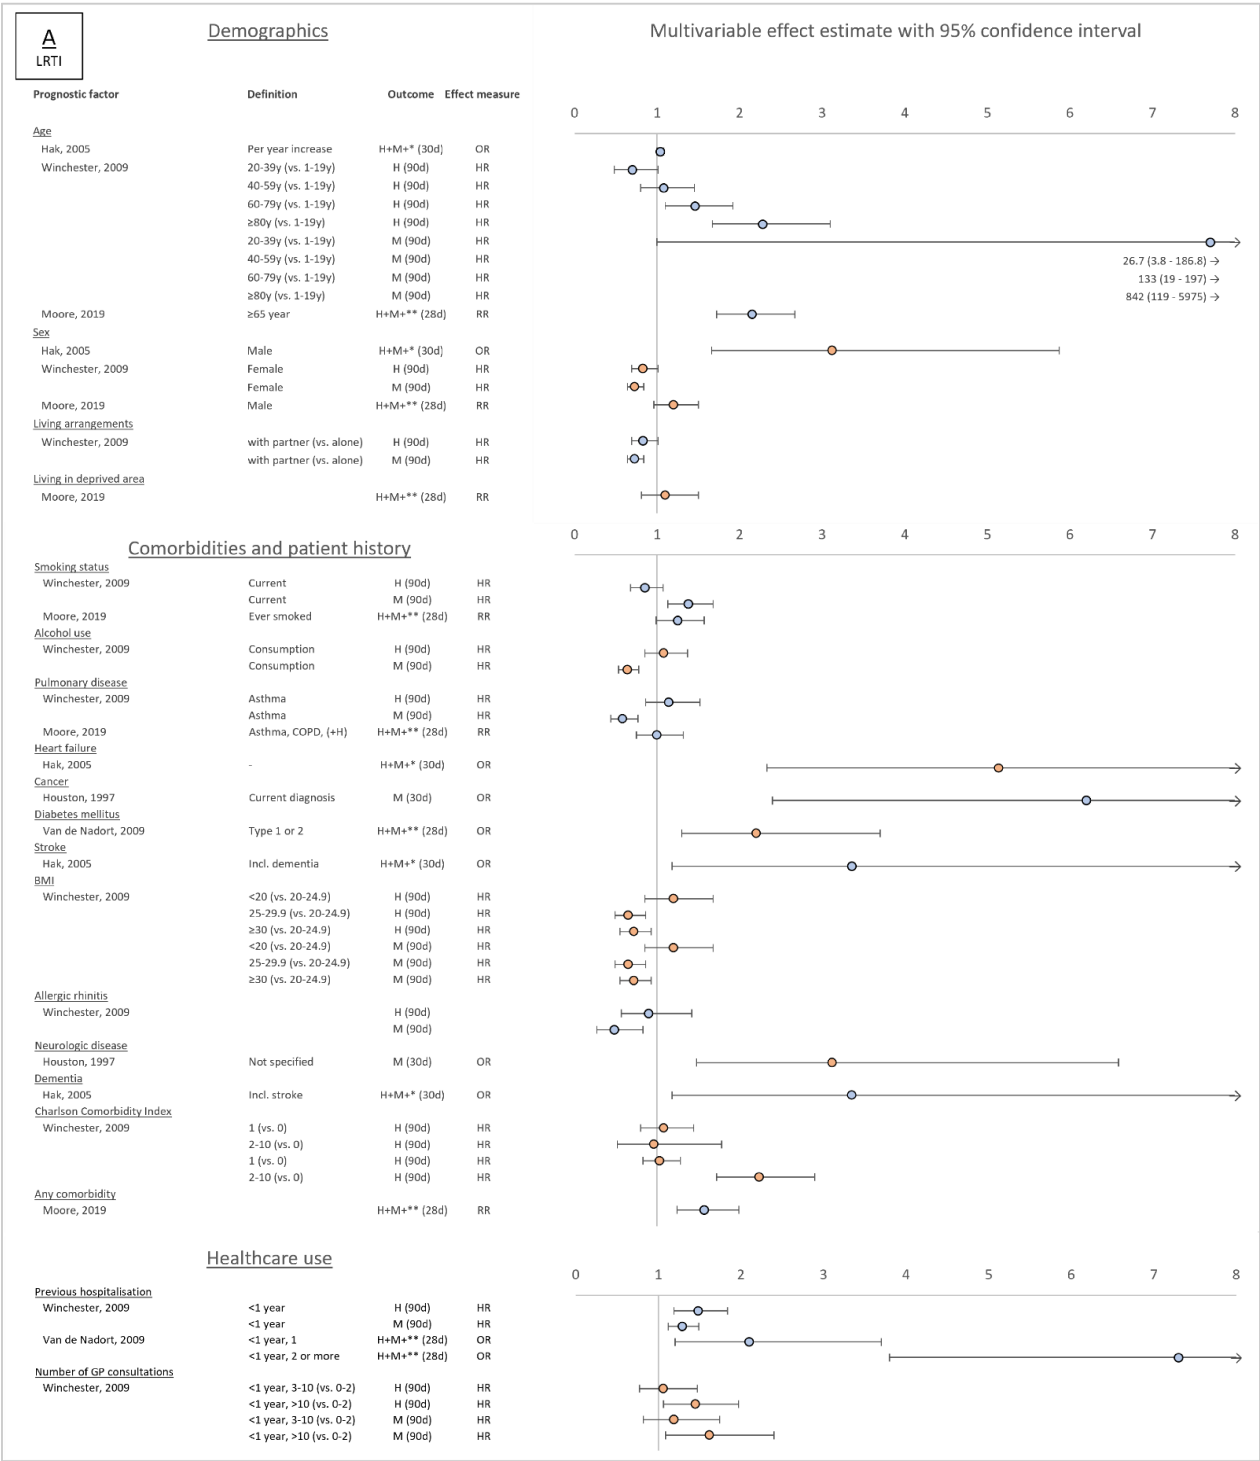

S6, continued

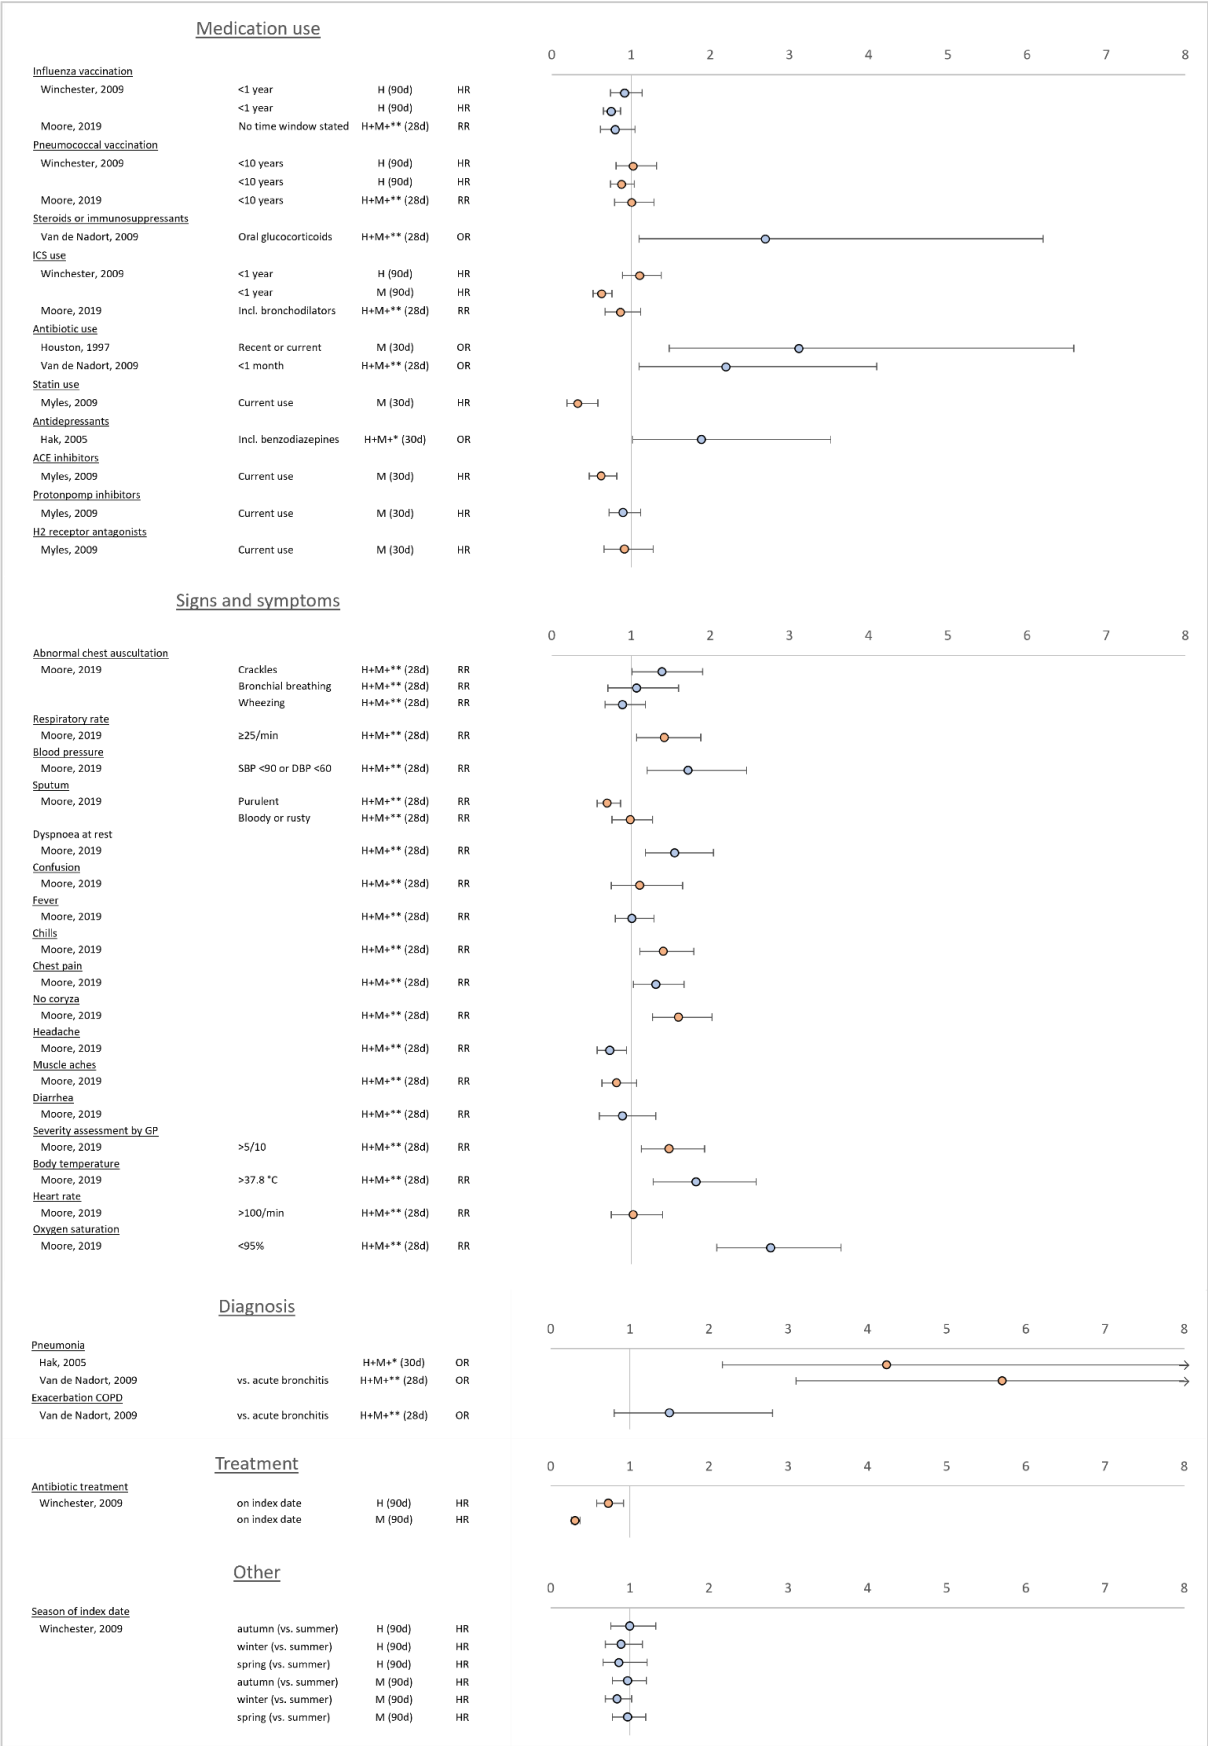

S6, continued

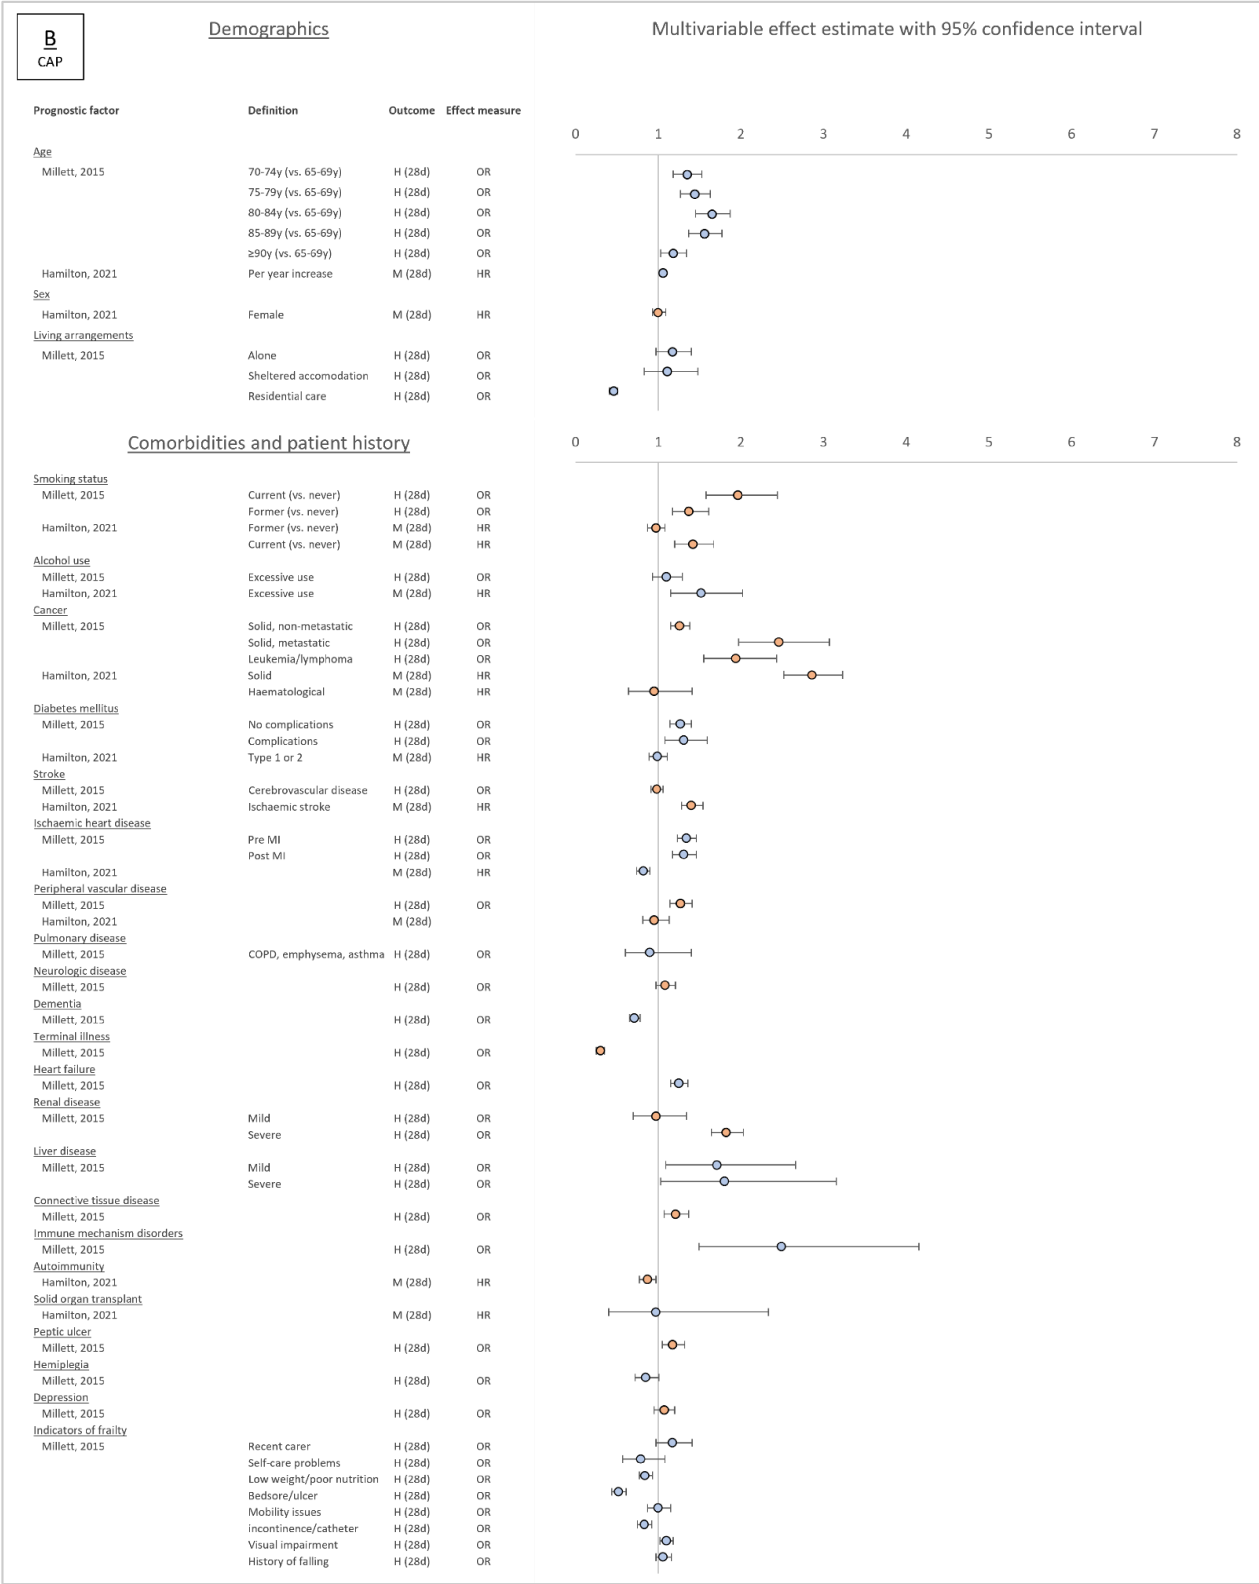

S6, continued

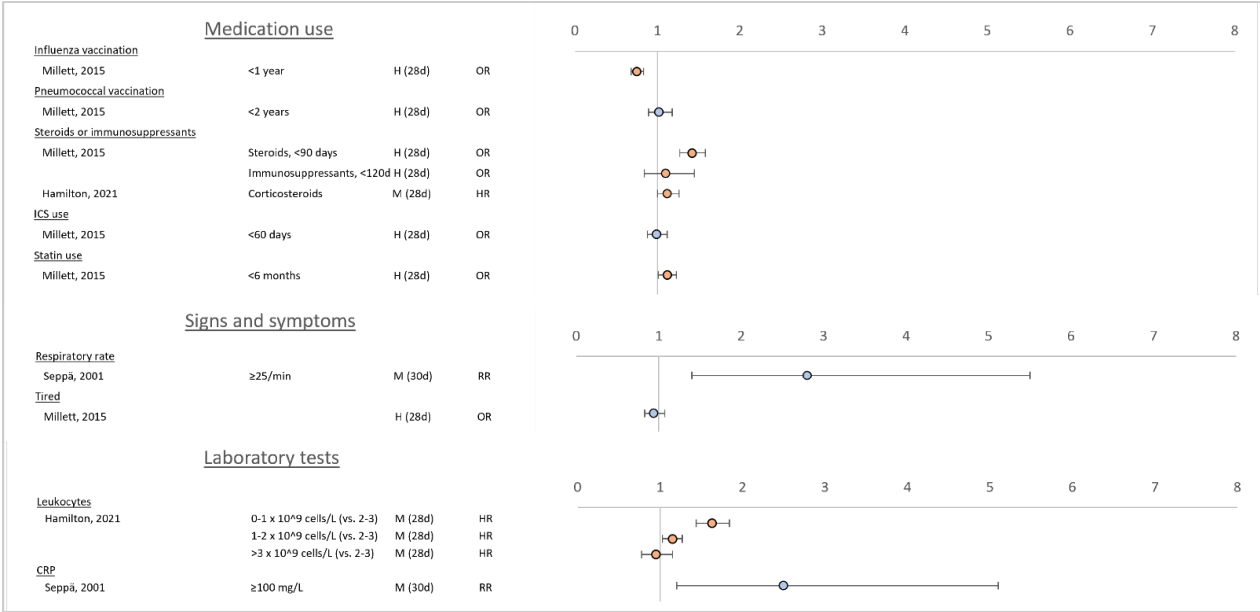

A. Multivariable analyses of prognostic factors from studies on LRTI patients. B. Multivariable analysis of prognostic factors from studies on pneumonia patients.

\* Composite outcome also includes dysregulation of diabetes, stroke, heart failure, MI.

\*\* Composite outcome also includes late onset pneumonia.

Abbreviations: LRTI, lower respiratory tract infection; H, hospitalisation; M, mortality; OR, odds ratio; RR, risk ratio; HR, hazard ratio; COPD, chronic obstructive pulmonary disease; BMI, body mass index; MI, myocardial infarction; GP, general practitioner; ICS, inhalation corticosteroids; ACE, angiotensin converting enzyme; SBP, systolic blood pressure; DBP, diastolic blood pressure; min, minute; L, liter; mg, milligram.

**Table S7:** Rating of the quality of evidence on promising prognostic factors based on the GRADE framework

| Prognostic factor        | GRADE criteria        |              |               |              |             |                  |                   | Quality of evidence |
|--------------------------|-----------------------|--------------|---------------|--------------|-------------|------------------|-------------------|---------------------|
|                          | Study design          | Risk of bias | Inconsistency | Indirectness | Imprecision | Publication bias | Upgrading factors |                     |
| Age                      | Cohort (high quality) | -2           | 0             | 0            | 0           | 0                | 0                 | Low                 |
| Sex                      | Cohort (high quality) | -2           | 0             | -1           | -1          | 0                | 0                 | Very low            |
| Smoking status           | Cohort (high quality) | -2           | -1            | -1           | -1          | 0                | 0                 | Very low            |
| Diabetes                 | Cohort (high quality) | -2           | 0             | -1           | 0           | 0                | 0                 | Very low            |
| Stroke                   | Cohort (high quality) | -2           | -1            | -1           | -1          | 0                | 0                 | Very low            |
| Cancer                   | Cohort (high quality) | -2           | 0             | -1           | 0           | 0                | 0                 | Very low            |
| Heart failure            | Cohort (high quality) | -2           | 0             | -1           | 0           | 0                | 0                 | Very low            |
| Previous hospitalisation | Cohort (high quality) | -2           | 0             | 0            | 0           | 0                | 0                 | Low                 |
| Systemic corticosteroids | Cohort (high quality) | -2           | 0             | -1           | -1          | 0                | 0                 | Very low            |
| Influenza vaccination    | Cohort (high quality) | -2           | 0             | 0            | -1          | 0                | 0                 | Very low            |
| Recent antibiotic use    | Cohort (high quality) | -2           | 0             | 0            | -1          | 0                | 0                 | Very low            |
| Respiratory rate         | Cohort (high quality) | -2           | 0             | -1           | 0           | 0                | 0                 | Very low            |
| Diagnosis of pneumonia   | Cohort (high quality) | -2           | 0             | 0            | 0           | 0                | 0                 | Low                 |

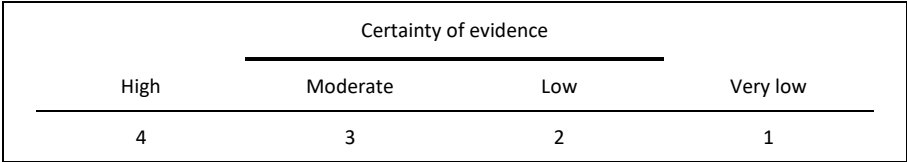

Application of the GRADE framework to rate the quality of evidence was based on prognostic research-specific guidance (Foroutan et al., 2020).

Abbreviations: GRADE, grading of recommendations, assessment, development, and evaluations.

**Table S8:** Overview of prediction models included in the synthesis

| Prediction model  | Predictors included in model                                                                               | Predictor weight |
|-------------------|------------------------------------------------------------------------------------------------------------|------------------|
| Bont, 2007 (new)  | - Diagnosis (either acute bronchitis, COPD exacerbation, or pneumonia)                                     | 0, 2, or 4       |
|                   | - Age $\geq 80$ years                                                                                      | 2                |
|                   | - Congestive heart failure                                                                                 | 1                |
|                   | - Diabetes                                                                                                 | 2                |
|                   | - Oral glucocorticoid use                                                                                  | 3                |
|                   | - Hospitalisations in previous year (0, 1, or $\geq 2$ )                                                   | 0, 2, or 3       |
|                   | - Antibiotic use in previous month                                                                         | 2                |
| CRB(-65)          | - Confusion                                                                                                | 1                |
|                   | - Respiratory rate $\geq 30$ /minute                                                                       | 1                |
|                   | - Blood pressure (SBP $\leq 90$ mmHg or DBP $\leq 60$ mmHg)                                                | 1                |
|                   | (- Age $\geq 65$ years)                                                                                    | 1                |
| CURB(-65)         | - Predictors of CRB(-65)                                                                                   | 0-4              |
|                   | - Blood urea nitrogen $>7$ mmol/L                                                                          | 1                |
| PSI (stage 1)     | - Age $>50$ years                                                                                          | Any versus none  |
|                   | - Altered mental status                                                                                    |                  |
|                   | - Pulse $>125$ /minute                                                                                     |                  |
|                   | - Respiratory rate $>30$ /minute                                                                           |                  |
|                   | - SBP $<90$ mmHg                                                                                           |                  |
|                   | - Temperature $<35^{\circ}\text{C}$ or $\geq 40^{\circ}\text{C}$                                           |                  |
|                   | - Neoplastic disease                                                                                       |                  |
|                   | - Congestive heart failure                                                                                 |                  |
|                   | - Cerebrovascular disease                                                                                  |                  |
|                   | - Renal disease                                                                                            |                  |
|                   | - Liver disease                                                                                            |                  |
| CORB-75 (new)     | - Confusion                                                                                                | 1                |
|                   | - Peripheral oxygen saturation $\leq 90\%$                                                                 | 1                |
|                   | - Respiratory rate $\geq 30$ /minute                                                                       | 1                |
|                   | - Blood pressure (SBP $\leq 90$ mmHg or DBP $\leq 60$ mmHg)                                                | 1                |
|                   | - Age $\geq 75$ years                                                                                      | 1                |
| RISSC85 (new)     | - Risk of poor outcome, grouped by country (A: Spain, B: Belgium, the Netherlands, Poland, UK, C: Germany) | A = 0, B/C = 1   |
|                   | - Interference in daily activities (some versus severe)                                                    | 1                |
|                   | - Number of years stopped smoking ( $>45$ years)                                                           | 1                |
|                   | - Severe sputum                                                                                            | 1                |
|                   | - Presence of crackles                                                                                     | 1                |
|                   | - Diastolic blood pressure ( $<85$ mmHg)                                                                   | 1                |
|                   |                                                                                                            |                  |
| Moore, 2019 (new) | - Oxygen saturation $<95\%$                                                                                | 1                |
|                   | - Age $>65$ years                                                                                          | 1                |
|                   | - Blood pressure (SBP $<90$ mmHg or DBP $<60$ mmHg)                                                        | 1                |
|                   | - Temperature $>37.8^{\circ}\text{C}$                                                                      | 1                |
|                   | - Any comorbidity (cardiovascular, cerebrovascular or lung comorbidities)                                  | 1                |
|                   | - No coryza                                                                                                | 1                |
|                   | - Severity assessment $>5/10$ by GP                                                                        | 1                |
|                   | - Chest pain                                                                                               | 1                |
|                   |                                                                                                            |                  |

Abbreviations: COPD, chronic obstructive pulmonary disease; SBP, systolic blood pressure; DBP, diastolic blood pressure; GP, general practitioner.

**Table S9:** Rating of the quality of evidence on prediction models based on the GRADE framework

| Prediction model | GRADE criteria        |              |               |              |             |                  |                   | Quality of evidence |
|------------------|-----------------------|--------------|---------------|--------------|-------------|------------------|-------------------|---------------------|
|                  | Study design          | Risk of bias | Inconsistency | Indirectness | Imprecision | Publication bias | Upgrading factors |                     |
| Bont, 2007       | Cohort (high quality) | -2           | 0             | 0            | -1          | 0                | 0                 | Very low            |
| CRB              | Cohort (high quality) | -2           | 0             | -1           | -1          | 0                | 0                 | Very low            |
| CRB-65           | Cohort (high quality) | -2           | 0             | 0            | 0           | 0                | 0                 | Low                 |
| CURB             | Cohort (high quality) | -2           | 0             | -1           | -1          | 0                | 0                 | Very low            |
| CURB-65          | Cohort (high quality) | -2           | 0             | -1           | -1          | 0                | 0                 | Very low            |
| PSI              | Cohort (high quality) | -2           | 0             | -1           | -1          | 0                | 0                 | Very low            |
| CORB-75          | Cohort (high quality) | -2           | 0             | -1           | -1          | 0                | 0                 | Very low            |
| RISCC85          | Cohort (high quality) | -2           | 0             | -1           | -1          | 0                | 0                 | Very low            |
| Moore, 2019      | Cohort (high quality) | -2           | 0             | -1           | -1          | 0                | 0                 | Very low            |

| Certainty of evidence |          |     |          |
|-----------------------|----------|-----|----------|
| High                  | Moderate | Low | Very low |
| 4                     | 3        | 2   | 1        |

Application of the GRADE framework to rate the quality of evidence was based on prognostic research-specific guidance (Brozek et al., 2021).

Abbreviations: GRADE, grading of recommendations, assessment, development, and evaluations.
